# Supplementary material for: Thin TiOxlayer as a voltage divider layer located at the quasi-Ohmic junction in the Pt/Ta2O5/Ta resistance switching memory
Source: Royal Society of Chemistry journal article supplement (doi:10.1039/c6nr08470b), 2017-01-01
Supplement: c6nr08470b1.pdf [file c6nr08470b1.pdf]

## Supporting Information

### Thin $\text{TiO}_x$ layer as a voltage divider layer located at the quasi-Ohmic junction in the Pt/ $\text{Ta}_2\text{O}_5$ /Ta resistance switching memory

Xiang Yuan Li,<sup>a</sup> Xing Long Shao,<sup>b</sup> Yi Chuan Wang,<sup>a</sup> Hao Jiang,<sup>a</sup> Cheol Seong Hwang,<sup>\*,b</sup> and Jin Shi Zhao<sup>#,a</sup>

<sup>a</sup> School of Electronics Information Engineering, Tianjin Key Laboratory of Film Electronic & Communication Devices, Tianjin University of Technology, No. 391, Binshuixi Road, Xiqing District, Tianjin, 300384, China

<sup>b</sup> Department of Materials Science and Engineering and Inter-university Semiconductor Research Center, Seoul National University, Gwanak-ro 1, Daehag-dong, Gwanak-gu, Seoul, 151-744, Republic of Korea

\* Author to whom correspondence should be addressed: [jinshi58@163.com](mailto:jinshi58@163.com)

# Author to whom correspondence should be addressed: [cheolsh@snu.ac.kr](mailto:cheolsh@snu.ac.kr)

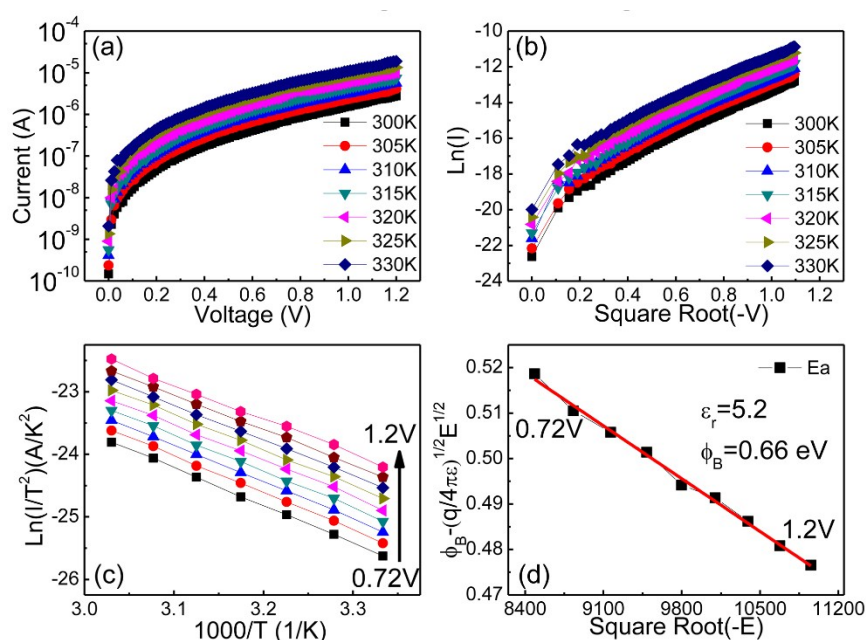

Fig. S1 (a) The I-V curves of the pristine w/Ti sample in the positive bias region, which were measured at temperatures ranging from 300 K to 330 K. (b) The replotted data in (a) according to Schottky emission formula. (c) The  $\ln(I/T^2)$  was plotted as a function of  $1000/T$  at various

voltages that ranged from 0.72 V to 1.2 V to calculate the  $E_a$ , and the results are summarized in (d).

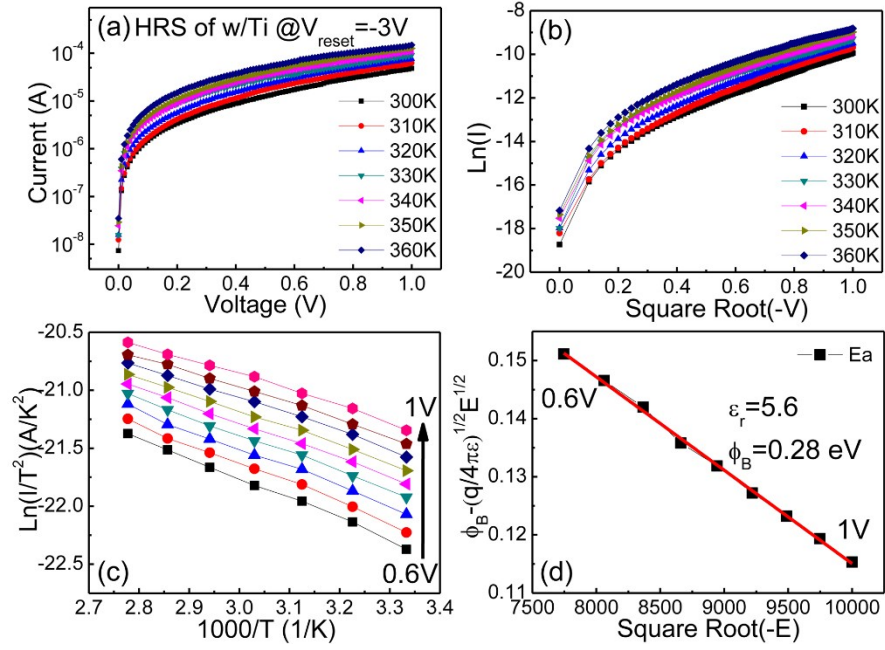

Fig. S2 (a) The I-V curves of the HRS for the w/Ti sample in the positive bias region, which were measured at temperatures ranging from 300K to 360 K. (b) The replotted data in (a) according to Schottky emission formula. (c) The  $\ln(I/T^2)$  was plotted as a function of  $1000/T$  at various voltages that ranged from 0.6 V to 1.0 V to calculate the  $E_a$ , and the results are summarized in (d).
